# Supplementary material for: The Integrator complex controls the termination of transcription at diverse classes of gene targets
Source: PubMed Central journal article supplement — Cell Res. 2015 Feb 13;25(3):288–305. doi: 10.1038/cr.2015.19 (PMC4349240; doi:10.1038/cr.2015.19), 2015-02-13
Supplement: cr201519x2.pdf [file cr201519x2.pdf]

A)

| Targets       | INTS3 | NABP1 | NABP2 | INTS9 | NELF HIT-Seq | SPT5 HIT-Seq | NELFA ChIP-Seq | SPT5 ChIP-Seq |      |
|---------------|-------|-------|-------|-------|--------------|--------------|----------------|---------------|------|
| INTS3         | 554   | X     | 84.8  | 51.4  | 50           | 72.4         | 68.8           | 91.2          | 69.1 |
| NABP1         | 2337  | X     | 24.7  | 21.8  | 44.5         | 41.1         | 87.8           | 56            |      |
| NABP2         | 867   | 32.9  | 83.6  | X     | 35.4         | 57           | 55             | 88.6          | 62.9 |
| INTS9         | 1092  | 20.8  | 58.7  | 28.1  | X            | 48.4         | 40.2           | 87.5          | 48.7 |
| NELF HIT-Seq  | 2364  | 17    | 55.2  | 20.9  | 22.4         | X            | 50.1           | 89.6          | 58.4 |
| SPT5 HIT-Seq  | 2015  | 18.9  | 60    | 23.7  | 21.8         | 58.8         | X              | 91.1          | 64.6 |
| NELF ChIP-Seq | 12026 | 4.2   | 21.4  | 6.4   | 7.9          | 17.6         | 15.3           | X             | 44.7 |
| SPT5 ChIP-Seq | 5630  | 6.8   | 29.2  | 9.7   | 9.4          | 24.5         | 23.1           | 95.4          | X    |

B)

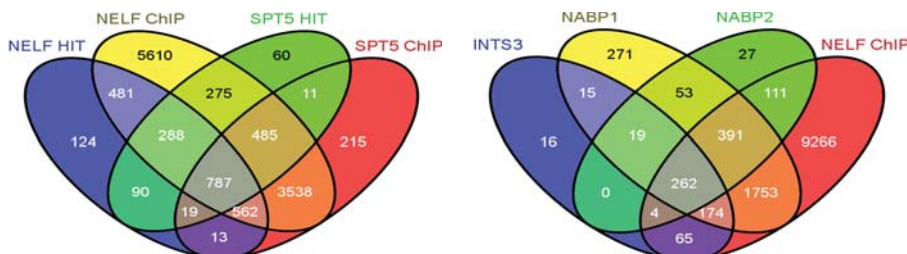

C) INTS9 Targets, Cell Compartment

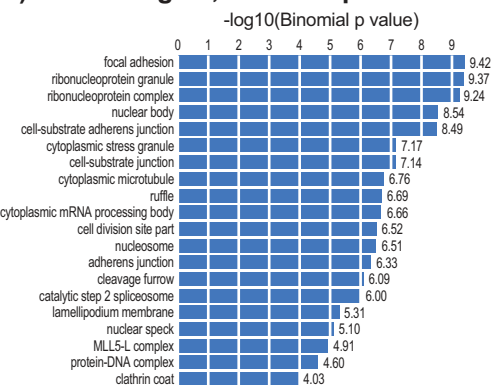

NELF Targets, Cell Compartment

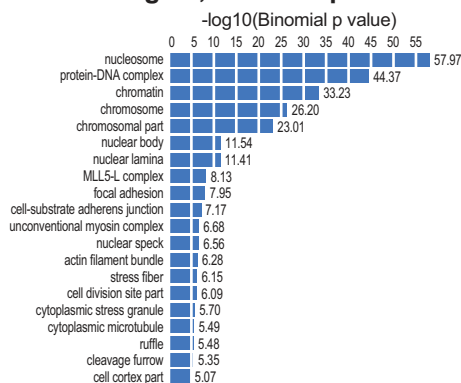

SPT5 Targets, Cell Compartment

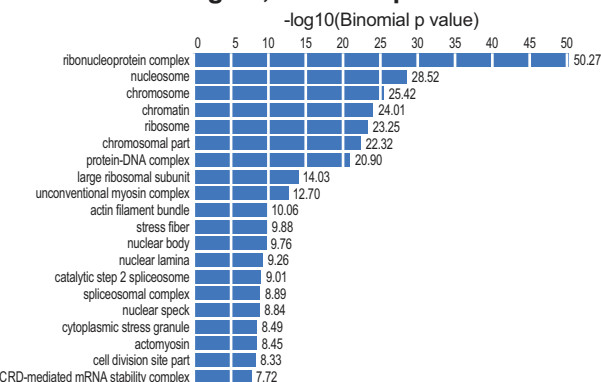

## **Supplementary information, Figure S2 Extended Intersection and Gene**

### **Ontology analysis of HIT-Seq data.**

A) The percent intersection of target genes for each pair-wise combination is shown. The analysis includes the INTS3, NABP1, NABP2, INTS9, SPT5, and NELF composite HIT-Seq analyses and the existing NELF A and SPT5 ChIP-Seq analyses. HIT-Seq targets were defined as genes intersecting with a 2kb window containing six virus integration events, and ChIP-Seq targets were defined by intersection of peaks with genes.

B) The left Venn diagram shows the validation of the NELF composite and SPT5 HIT-Seq analyses by comparison with existing NELF A and SPT5 ChIP-Seq datasets. Gene targets were defined as in (A). The right Venn diagram shows the intersection of the INTS3, NABP1, and NABP2 HIT-Seq datasets with the NELF A ChIP-Seq dataset.

C) The gene ontology analysis for the cell compartment of INTS9, NELF, and SPT5 was performed using HIT-Seq data and GREAT.
