# Supplementary material for: The Integrator complex controls the termination of transcription at diverse classes of gene targets
Source: PubMed Central journal article supplement — Cell Res. 2015 Feb 13;25(3):288–305. doi: 10.1038/cr.2015.19 (PMC4349240; doi:10.1038/cr.2015.19), 2015-02-13
Supplement: cr201519x3.pdf [file cr201519x3.pdf]

## A) NELF Target Protein Families

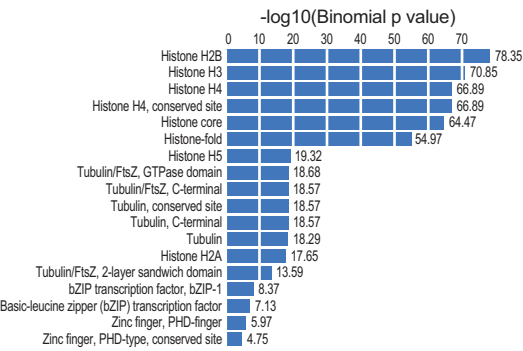

## SPT5 Target Protein Families

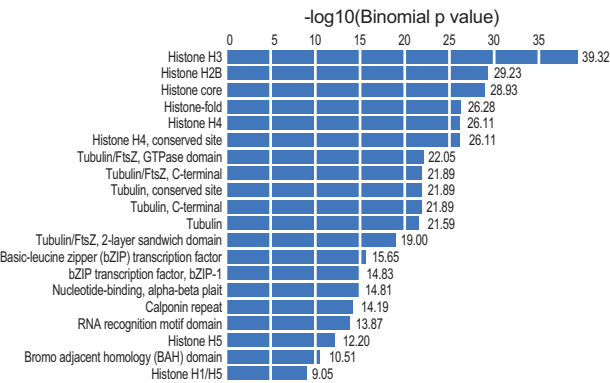

## NABP1 Target Protein Families

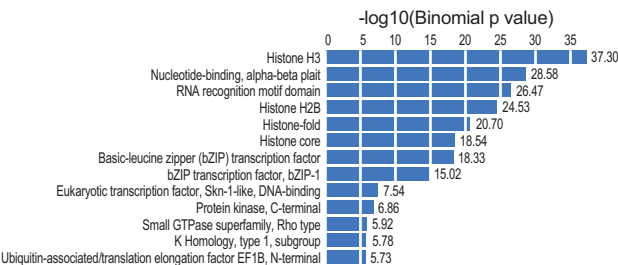

## B) NABP1 integrations relative to TSSs

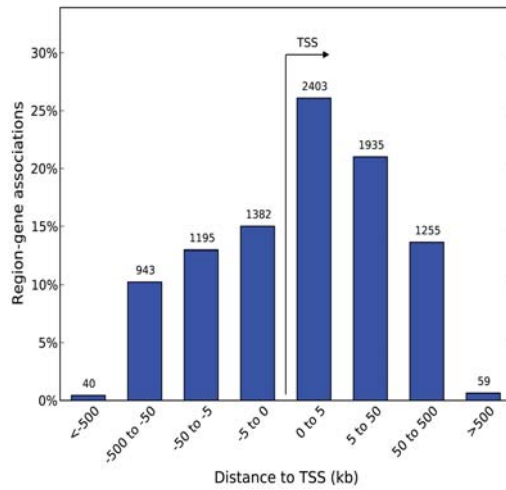

## NABP2 integrations relative to TSSs

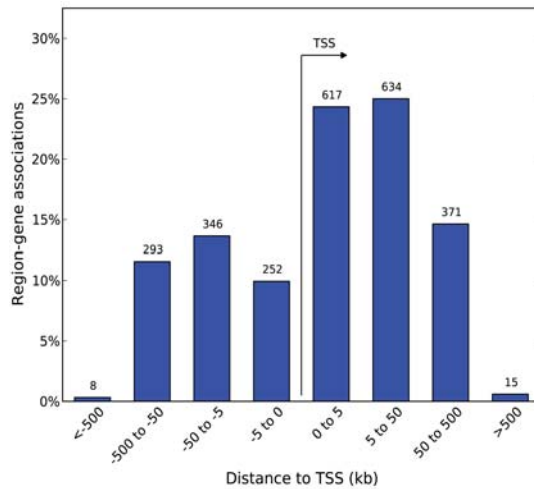

## INTS9 integrations relative to TSSs

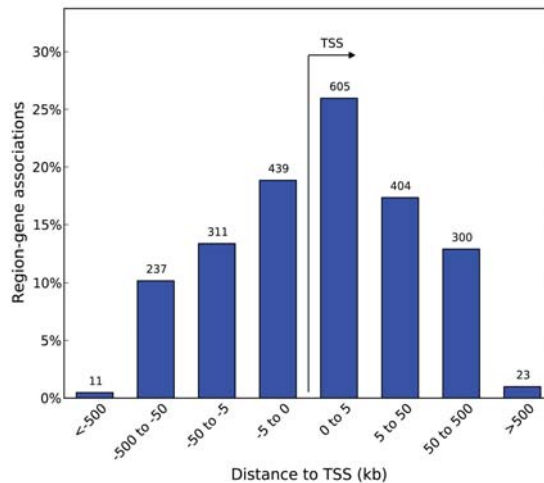

**Supplementary information, Figure S3 Integrator binds near the transcriptional start sites of genes.**

A) The gene ontology analysis for common protein families in the NELF, SPT5, and NABP1 HIT-Seq datasets was performed using GREAT.

B) The distance of NABP1, NABP2, and INTS9 HIT-Seq integrations to transcriptional start sites (TSS) was analyzed via GREAT.
