# Supplementary material for: The Integrator complex controls the termination of transcription at diverse classes of gene targets
Source: PubMed Central journal article supplement — Cell Res. 2015 Feb 13;25(3):288–305. doi: 10.1038/cr.2015.19 (PMC4349240; doi:10.1038/cr.2015.19), 2015-02-13
Supplement: cr201519x5.pdf [file cr201519x5.pdf]

A)



B)



C)



D)



**Supplementary information, Figure S5 Integrator regulates replication-dependent histones.**

A) Oligo-dT primed cDNAs from HeLa cells transfected with the indicated siRNAs were analyzed by qPCR for total histone transcripts relative to Actin. The results are presented relative to the control sample. The mean is presented plus or minus one standard deviation.

B) Total histone RNAs from HeLa cells transfected with the indicated siRNAs were analyzed by qPCR for the mature histone mRNAs relative to 18S rRNA. Each sample is presented relative to the control sample. The mean is presented plus or minus one standard deviation.

C) T98G cells were synchronized in G0 by serum starvation (0.1%) for 72 hours before release with serum. Lysates were immunoprecipitated and western blotted as indicated. WCL = whole cell lysate.

D) HeLa cells transfected with the indicated siRNAs were extracted with CSK buffer to extract the cytoplasm and nucleoplasm. The remaining pellet was treated with benzonase and sonication to extract the chromatin. Western blotting was performed as indicated.
