# Supplementary material for: The Integrator complex controls the termination of transcription at diverse classes of gene targets
Source: PubMed Central journal article supplement — Cell Res. 2015 Feb 13;25(3):288–305. doi: 10.1038/cr.2015.19 (PMC4349240; doi:10.1038/cr.2015.19), 2015-02-13
Supplement: cr201519x6.pdf [file cr201519x6.pdf]

A)



B)



C)



**Supplementary information, Figure S6 Integrator does not affect NELF or SPT5 recruitment.**

A) Following a control or INTS3 knockdown, ChIP was performed for NELF B from HeLa cells and was analyzed by qPCR for the 3' region of the U2 snRNA locus or the *JUNB* transcriptional start site (TSS). Error bars show the standard deviation of three PCR reactions.

B) Following a control or INTS3 knockdown, ChIP was performed for Pol II or SPT5 from HeLa cells and was analyzed by qPCR for the 3' region of the U2 snRNA locus or the *JUNB* transcriptional start site (TSS). Error bars show the standard deviation of three PCR reactions.

e) SPT5 knockdown was validated by western blotting as indicated.
