# Supplementary material for: The Integrator complex controls the termination of transcription at diverse classes of gene targets
Source: PubMed Central journal article supplement — Cell Res. 2015 Feb 13;25(3):288–305. doi: 10.1038/cr.2015.19 (PMC4349240; doi:10.1038/cr.2015.19), 2015-02-13
Supplement: cr201519x7.pdf [file cr201519x7.pdf]

**Supplementary information, Table S1** Oligos used for qPCR and ChIP qPCR

| U2 snRNA:       |                            | Notes     |
|-----------------|----------------------------|-----------|
| Total           | CTCGGCCTTTTGGCTAAGAT       |           |
|                 | CGTTCCTGGAGGTACTGCAA       |           |
| Unprocessed     | GGAGCAGGGAGATGGAATAGGAGCTT |           |
|                 | CAGGACTCGTGCAAGCCGCC       |           |
| ChIP (+292)     | GCCGAGTGCCTGTGACGC         |           |
|                 | GGAACCTCACGGTACTTCAGGG     |           |
|                 |                            |           |
| Histone H2A:    |                            | HIST2H2AB |
| ChIP            | AGGCTTGTGACTCTCCGTTT       |           |
|                 | CAACTAGCCGTGAGGAATGA       |           |
| Total           | CCGGTCTTCAGTTTCCAGTT       | HIST1H2AE |
|                 | CCGACTCGTTCGGAGTAGTT       |           |
| Unprocessed     | TCCTTGCTCACATTTTCATGC      | HIST1H2AE |
|                 | CACAGCATGGACCTATACACAA     |           |
|                 |                            |           |
| Histone H2B:    |                            |           |
| Total           | CCTGAGCCAGCCAAGTCTGC       | HIST1H2BC |
|                 | TGCGGCTGCGCTTGCGCTTC       |           |
| Unprocessed     | TAAAAGAGCTGTGGCCAGAC       | HIST1H2BC |
|                 | GTCCCTCTCTAAGCTGCAAC       |           |
|                 |                            |           |
| Histone H3:     |                            |           |
| Total           | TATCGGCCTGGTACAGTGG        | HIST1H3H  |
|                 | CGCAAGTCGGTCTTGAAGT        |           |
| Unprocessed     | GGCCTGCTTAAACCACTTA        | HIST1H3H  |
|                 | GGCTTCAAAGGGAATGTTCT       |           |
|                 |                            |           |
| Histone H4:     |                            |           |
| Total           | CCATCCGGCGCCTTGCTC         | HIST1H4K  |
|                 | TTCAGCACCCCGCGAGTC         |           |
| Unprocessed     | TTCAGGTGCTCCAGAGCTTACT     | HIST1H4K  |
|                 | AGCCATGATGACACTGCACTAC     |           |
|                 |                            |           |
| Histone H3.3:   |                            |           |
| Coding Sequence | GCAGGAGGCAAGTGAGGCCT       |           |
|                 | TTAAGCACGTTCTCCACGTA       |           |
| 3' UTR          | GGACAGAAATCAGGTATTGGC      |           |
|                 | TGAACCGCTGAAACTTGTTCT      |           |
|                 |                            |           |
| JUNB:           |                            |           |

|               |                         |           |
|---------------|-------------------------|-----------|
| ChIP          | GGCTGGGACCTTGAGAGC      |           |
|               | GTGCGCAAAAGCCCTGTC      |           |
| qPCR          | CACCAAGTGCCGGAAGCGGA    |           |
|               | AGGGGCAGGGGACGTTCAGA    |           |
|               |                         |           |
| GADD45B:      |                         |           |
| qPCR          | GATGAATGTGGACCCAGACA    |           |
|               | GTCACAGCAGAAGGACTGGA    |           |
|               |                         |           |
| FOSL1:        |                         |           |
| qPCR          | GGAAGGAACTGACCGACTTC    |           |
|               | GCAGCCCAGATTCTCATCT     |           |
|               |                         |           |
| GAPDH:        |                         |           |
| qPCR          | ATGGGTGTGAACCATGAGAA    |           |
|               | GTGCTAAGCAGTTGGTGGTG    |           |
|               |                         |           |
| 18S rRNA:     |                         |           |
| qPCR          | GGACACGGACAGGATTGACA    |           |
|               | ACCCACGGAATCGAGAAAGA    |           |
|               |                         |           |
| Actin:        |                         |           |
| qPCR          | ACAGAGCCTCGCCTTTGCCG    |           |
|               | TGGCCTCGTCGCCACATA      |           |
|               |                         |           |
| ChIP Primers: |                         |           |
| H2A           |                         | HIST2H2AB |
| 1             | ATGTCAGGACGCGAAAGCAGG   |           |
|               | GCCTTTGCGCAGCAAGCGGT    |           |
| 328           | CCAATATCCAGGCTGTCCTG    |           |
|               | CATTTGACACTTTGGTGGC     |           |
| 523           | GCCTTTGGTCTTGGTTTGT     |           |
|               | CCAGCTGGCCATCCGCAACGACG |           |
| 599           | CGGCCTGGATGTTAGGCAAA    |           |
|               | AAGAAGACGCGCATCATCCC    |           |

|                                                                       |                              |                |
|-----------------------------------------------------------------------|------------------------------|----------------|
| U2 snRNA (from Glover-Cutter <i>et al</i> unless noted):              |                              |                |
| -158                                                                  | GGAACGCCGGAAGAAGCAC          |                |
|                                                                       | CCCTTACTCTCGGGCTGA           |                |
| 1                                                                     | TGGATGAGAGTGGGACGGTG         |                |
|                                                                       | AGCCAAAAGGCCGAGAAGC          |                |
| 219                                                                   | CTCCGGGGATACAACGTGTTT        |                |
|                                                                       | CGCAGGTGCTACCGTCTCTCA        |                |
| 292                                                                   | GCCGAGTGCCTGTGACGC           |                |
|                                                                       | GGAACCTCACGGTACTTCAGGG       |                |
| 458                                                                   | GGGAGGTCCTTAGGATCTCAGC       |                |
|                                                                       | GAGAGACAGGAGAAAGAAGAACTCCG   |                |
| 778                                                                   | CGTGTGCCACGGTGCTTT           |                |
|                                                                       | GCATGCGGGGCTTCAAACCTAGA      |                |
| 1182                                                                  | GTCCTGCAGTAAACATACGTG        | New this study |
|                                                                       | AAGCTTGCTGCCGGTGCGTTG        |                |
|                                                                       |                              |                |
| Histone H4 (HIST1H4K) (from Glover-Cutter <i>et al</i> unless noted): |                              |                |
| 382                                                                   | GGTTGAGCGTCCCTTTCTATCAACA    |                |
|                                                                       | TGGGCAAACAAGCATCACGG         |                |
| 586                                                                   | TTCAGGTGCTCCAGAGCTTACT       |                |
|                                                                       | AGCCATGATGACACTGCACTAC       |                |
| 714                                                                   | CAAAGACCGGGTCTCCGTG          |                |
|                                                                       | AGGGGATTGAGGCCAGGATA         |                |
| 881                                                                   | GTGTAGTGGGGAGGAAAAGTC        | New this study |
|                                                                       | CAAGAATTGGGCCAAAACCG         |                |
| 1012                                                                  | CCAATTCTTGAGAAAGGTGAG        | New this study |
|                                                                       | CCCACGTTAAGTAACAAAGG         |                |
| 1264                                                                  | AGTCATATTTGAGGTTATCCAACCCG   |                |
|                                                                       | CCCACAAGGTGATAGTATCCTTAAACCA |                |
|                                                                       |                              |                |
| JUNB (from Aida <i>et al</i> 2006)                                    |                              |                |
| -458                                                                  | CCCTCATTCTGCTTTTTGG          |                |
|                                                                       | TGGAGTCCACTGGGACAAAT         |                |
| -169                                                                  | CCGCTGTTTACAAGGACACG         |                |
|                                                                       | GGAAGTGCCTCCGATTG            |                |
| -3                                                                    | GGCTGGGACCTTGAGAGC           |                |
|                                                                       | GTGCGCAAAGCCCTGTC            |                |

|      |                      |  |
|------|----------------------|--|
| 284  | CCGGATGTGCACTAAAATGG |  |
|      | AGGCTCGGTTTCAGGAGTTT |  |
| 716  | GGACGATCTGCACAAGATGA |  |
|      | TGCTGAGGTTGGTGTAACG  |  |
| 1091 | CATCAAAGTGGAGCGCAAG  |  |
|      | TTGAGCGTCTTCACCTTGTC |  |
|      |                      |  |
